# Supplementary material for: Dietary Methyl-Group Donor Intake and Breast Cancer Risk in the European Prospective Investigation into Cancer and Nutrition (EPIC)
Source: Nutrients. 2021 May 28;13(6):1843. doi: 10.3390/nu13061843 (PMC8228096; doi:10.3390/nu13061843)
Supplement: Supplementary file 1 [file nutrients-13-01843-s001.zip › nutrients-1210029-supplementary.pdf]

# APPENDIX A - Dietary methyl-group donor intake and breast cancer risk: European Prospective Investigation into Cancer and Nutrition (EPIC)

| <b>Appendix A - Table S1:</b> Hazard ratios (HRs) and 95% confidence intervals (CIs) for breast cancer (BC) by daily dietary intake of methyl-group donors in women in the EPIC cohort <b>after different sensitivity tests</b> |                                            |                      |                     |                                        |                         |
|---------------------------------------------------------------------------------------------------------------------------------------------------------------------------------------------------------------------------------|--------------------------------------------|----------------------|---------------------|----------------------------------------|-------------------------|
| <b>Model</b>                                                                                                                                                                                                                    | <b>Exposure</b>                            | <b>N of BC cases</b> | <b>Person years</b> | <b>Multivariable model HR (95% CI)</b> | <b>P<sub>cont</sub></b> |
| Model a                                                                                                                                                                                                                         | MGD score                                  | 13,320               | 4,492,760           | 1.00 (0.98-1.01)                       | 0.456                   |
| Model a                                                                                                                                                                                                                         | Dietary folate (per 1 SD/day = 128 µg/day) | 13,320               | 4,492,760           | 1.01 (0.98-1.05)                       | 0.547                   |
| Model a                                                                                                                                                                                                                         | Choline (per 1 SD/day = 90 mg/day)         | 13,320               | 4,492,760           | 1.00 (0.98-1.03)                       | 0.943                   |
| Model a                                                                                                                                                                                                                         | Betaine (per 1 SD/day = 88 mg/day)         | 13,320               | 4,492,760           | 0.99 (0.96-1.02)                       | 0.419                   |
| Model a                                                                                                                                                                                                                         | Methionine (per 1g/day)                    | 13,320               | 4,492,760           | 0.97 (0.92-1.02)                       | 0.188                   |
| Model S1                                                                                                                                                                                                                        | MGD score                                  | 13,320               | 4,492,760           | 1.00 (0.99-1.02)                       | 0.832                   |
| Model S1                                                                                                                                                                                                                        | Dietary folate (per 1 SD/day = 128 µg/day) | 13,320               | 4,492,760           | 1.02 (0.98-1.06)                       | 0.247                   |
| Model S1                                                                                                                                                                                                                        | Choline (per 1 SD/day = 90 mg/day)         | 13,320               | 4,492,760           | 1.02 (0.99-1.05)                       | 0.214                   |
| Model S1                                                                                                                                                                                                                        | Betaine (per 1 SD/day = 88 mg/day)         | 13,320               | 4,492,760           | 0.99 (0.96-1.01)                       | 0.353                   |
| Model S1                                                                                                                                                                                                                        | Methionine (per 1g/day)                    | 13,320               | 4,492,760           | 0.98 (0.91-1.05)                       | 0.486                   |
| Model S2                                                                                                                                                                                                                        | MGD score                                  | 13,320               | 4,492,760           | 1.00 (0.98-1.01)                       | 0.875                   |
| Model S2                                                                                                                                                                                                                        | Dietary folate (per 1 SD/day =128 µg/day)  | 13,320               | 4,492,760           | 1.01 (0.98-1.05)                       | 0.479                   |
| Model S2                                                                                                                                                                                                                        | Choline (per 1 SD/day = 90 mg/day)         | 13,320               | 4,492,760           | 1.01 (0.98-1.04)                       | 0.394                   |
| Model S2                                                                                                                                                                                                                        | Betaine (per 1 SD/day = 88 mg/day)         | 13,320               | 4,492,760           | 0.92 (0.79-1.07)                       | 0.251                   |
| Model S2                                                                                                                                                                                                                        | Methionine (per 1g/day)                    | 13,320               | 4,492,760           | 0.96 (0.89-1.03)                       | 0.278                   |
| Model S3                                                                                                                                                                                                                        | MGD score                                  | 13,320               | 4,492,760           | 0.99 (0.98-1.01)                       | 0.311                   |
| Model S3                                                                                                                                                                                                                        | Dietary folate (per 1 SD/day = 128 µg/day) | 13,320               | 4,492,760           | 1.00 (0.97-1.03)                       | 0.962                   |
| Model S3                                                                                                                                                                                                                        | Choline (per 1 SD/day = 90 mg/day)         | 13,320               | 4,492,760           | 1.00 (0.97-1.03)                       | 0.962                   |
| Model S3                                                                                                                                                                                                                        | Betaine (per 1 SD/day = 88 mg/day)         | 13,320               | 4,492,760           | 0.99 (0.96-1.02)                       | 0.422                   |
| Model S3                                                                                                                                                                                                                        | Methionine (per 1g/day)                    | 13,320               | 4,492,760           | 0.97 (0.92-1.02)                       | 0.233                   |
| Model S4                                                                                                                                                                                                                        | MGD score                                  | 13,320               | 4,492,760           | 0.99 (0.98-1.01)                       | 0.393                   |
| Model S4                                                                                                                                                                                                                        | Dietary folate (per 1 SD/day = 128 µg/day) | 13,320               | 4,492,760           | 1.02 (0.99-1.06)                       | 0.204                   |
| Model S4                                                                                                                                                                                                                        | Choline (per 1 SD/day = 90 mg/day)         | 13,320               | 4,492,760           | 1.00 (0.98-1.03)                       | 0.772                   |
| Model S4                                                                                                                                                                                                                        | Betaine (per 1 SD/day = 88 mg/day)         | 13,320               | 4,492,760           | 0.98 (0.95-1.01)                       | 0.212                   |
| Model S4                                                                                                                                                                                                                        | Methionine (per 1g/day)                    | 13,320               | 4,492,760           | 0.98 (0.95-1.01)                       | 0.254                   |
| Model S5                                                                                                                                                                                                                        | MGD score                                  | 10,766               | 3,612,534           | 0.99 (0.98-1.01)                       | 0.427                   |
| Model S5                                                                                                                                                                                                                        | Dietary folate (per 1 SD/day = 128 µg/day) | 10,766               | 3,612,534           | 1.01 (0.97-1.05)                       | 0.577                   |
| Model S5                                                                                                                                                                                                                        | Choline (per 1 SD/day = 90 mg/day)         | 10,766               | 3,612,534           | 1.00 (0.98-1.03)                       | 0.772                   |
| Model S5                                                                                                                                                                                                                        | Betaine (per 1 SD/day = 88 mg/day)         | 10,766               | 3,612,534           | 0.98 (0.95-1.01)                       | 0.212                   |
| Model S5                                                                                                                                                                                                                        | Methionine (per 1g/day)                    | 10,766               | 3,612,534           | 0.98 (0.95-1.01)                       | 0.254                   |
| Model S6                                                                                                                                                                                                                        | MGD score                                  | 13,320               | 4,492,760           | 1.00 (0.98-1.01)                       | 0.492                   |
| Model S6                                                                                                                                                                                                                        | Dietary folate (per 1 SD/day = 128 µg/day) | 13,320               | 4,492,760           | 1.01 (0.99-1.03)                       | 0.512                   |
| Model S6                                                                                                                                                                                                                        | Choline (per 1 SD/day = 90 mg/day)         | 13,320               | 4,492,760           | 1.00 (0.98-1.02)                       | 0.891                   |
| Model S6                                                                                                                                                                                                                        | Betaine (per 1 SD/day = 88 mg/day)         | 13,320               | 4,492,760           | 0.99 (0.98-1.01)                       | 0.433                   |
| Model S6                                                                                                                                                                                                                        | Methionine (per 1g/day)                    | 13,320               | 4,492,760           | 0.97 (0.92-1.02)                       | 0.188                   |
| Model S7                                                                                                                                                                                                                        | MGD score                                  | 13,320               | 4,492,760           | 1.00 (0.98-1.01)                       | 0.438                   |
| Model S7                                                                                                                                                                                                                        | Dietary folate (per 1 SD/day =128 µg/day)  | 13,320               | 4,492,760           | 1.01 (0.98-1.05)                       | 0.558                   |
| Model S7                                                                                                                                                                                                                        | Choline (per 1 SD/day = 90 mg/day)         | 13,320               | 4,492,760           | 1.00 (0.98-1.03)                       | 0.957                   |
| Model S7                                                                                                                                                                                                                        | Betaine (per 1 SD/day = 88 mg/day)         | 13,320               | 4,492,760           | 0.99 (0.96-1.01)                       | 0.412                   |
| Model S7                                                                                                                                                                                                                        | Methionine (per 1g/day)                    | 13,320               | 4,492,760           | 0.97 (0.92-1.02)                       | 0.181                   |
| Model S8                                                                                                                                                                                                                        | MGD score                                  | 13,320               | 4,492,760           | 1.00 (0.98-1.01)                       | 0.430                   |
| Model S8                                                                                                                                                                                                                        | Dietary folate (per 1 SD/day =128 µg/day)  | 13,320               | 4,492,760           | 1.01 (0.98-1.05)                       | 0.560                   |
| Model S8                                                                                                                                                                                                                        | Choline (per 1 SD/day = 90 mg/day)         | 13,320               | 4,492,760           | 1.00 (0.98-1.03)                       | 0.939                   |
| Model S8                                                                                                                                                                                                                        | Betaine (per 1 SD/day = 88 mg/day)         | 13,320               | 4,492,760           | 0.99 (0.96-1.01)                       | 0.367                   |
| Model S8                                                                                                                                                                                                                        | Methionine (per 1g/day)                    | 13,320               | 4,492,760           | 0.98 (0.96-1.01)                       | 0.193                   |
| Model S9                                                                                                                                                                                                                        | MGD score                                  | 13,320               | 4,492,760           | 1.00 (0.99-1.00)                       | 0.220                   |

|                                                                                                                                                                                                                                                                                                                                                                                                                                                                                                                                                                                                                                                                                                                                                                                                                                                                                                                                                                                                                                                                                                                                                                                                                                                                                                                                                                                                                                                                                                                                                                                                                                                                                                                                                                                                                                                                                                                                                                                                                                                                                                                                                                                                                                                                                                                                                                                                                                                           |           |        |           |                  |       |
|-----------------------------------------------------------------------------------------------------------------------------------------------------------------------------------------------------------------------------------------------------------------------------------------------------------------------------------------------------------------------------------------------------------------------------------------------------------------------------------------------------------------------------------------------------------------------------------------------------------------------------------------------------------------------------------------------------------------------------------------------------------------------------------------------------------------------------------------------------------------------------------------------------------------------------------------------------------------------------------------------------------------------------------------------------------------------------------------------------------------------------------------------------------------------------------------------------------------------------------------------------------------------------------------------------------------------------------------------------------------------------------------------------------------------------------------------------------------------------------------------------------------------------------------------------------------------------------------------------------------------------------------------------------------------------------------------------------------------------------------------------------------------------------------------------------------------------------------------------------------------------------------------------------------------------------------------------------------------------------------------------------------------------------------------------------------------------------------------------------------------------------------------------------------------------------------------------------------------------------------------------------------------------------------------------------------------------------------------------------------------------------------------------------------------------------------------------------|-----------|--------|-----------|------------------|-------|
| Model S10                                                                                                                                                                                                                                                                                                                                                                                                                                                                                                                                                                                                                                                                                                                                                                                                                                                                                                                                                                                                                                                                                                                                                                                                                                                                                                                                                                                                                                                                                                                                                                                                                                                                                                                                                                                                                                                                                                                                                                                                                                                                                                                                                                                                                                                                                                                                                                                                                                                 | MGD score | 13,320 | 4,492,760 | 1.00 (0.99-1.00) | 0.260 |
| <p>Model a: fully adjusted model (see Table 3 in the main text)</p> <p>Model S1: as model a, but additionally adjusted for dietary intakes of vitamin B12 (continuous), vitamin B6 (continuous) and vitamin B2 (continuous)</p> <p>Model S2: as model a, but additionally adjusted for dietary intakes of serine (continuous) and glycine (continuous)</p> <p>Model S3: as model a, but additionally adjusted for the Mediterranean Diet Score (continuous), and no longer adjusted for dietary fibre intake</p> <p>Model S4: as model a, but additionally adjusted for dietary intakes of the food groups fruit (g/day, continuous), vegetables (g/day, continuous), cereal (g/day, continuous), dairy and dairy products (g/day, continuous), meat and meat products (g/day, continuous), and no longer adjusted for dietary fibre intake</p> <p>Model S5: excluding participants with missing values in any of the covariates of model a</p> <p>Model S6: as model a, but adjusted for energy intake using the residual method instead of the standard method: center-specific residuals for dietary folate, choline, betaine and methionine intake were added to center-specific mean values to maintain geographical specificity of dietary assessments and to recuperate the original scale for easier interpretation respectively</p> <p>Model S7: as model a, but adjusted for alcohol free energy intake (kcal/day) using the standard method instead of adjusted for total energy intake (kcal/day)</p> <p>Model S8: as model a, but analyses were stratified by five-year categories of age at recruitment, instead of one-year categories</p> <p>Model S9: an additional MGD-score was obtained by adding the z-scores of the individual folate, choline, betaine, methionine, vitamin B12, B6 and B2 intakes to account for their overall association, including co-factors within the one-carbon metabolism, with BC risk.</p> <p>Model S10: an additional MGD-score was obtained by adding the z-scores of the individual folate, choline, betaine, methionine, vitamin B12, B6, B2, serine and glycine intakes to account for their overall association, including co-factors within the one-carbon metabolism and amino-acids containing methyl groups, with BC risk.</p> <p>Abbreviations: HR: hazard ratio; CI: confidence interval; BC: breast cancer; MGD: methyl-group donor; N: number of participants; SD: standard deviation</p> |           |        |           |                  |       |

## APPENDIX B - Dietary methyl-group donor intake and breast cancer risk: European Prospective Investigation into Cancer and Nutrition (EPIC)

**Appendix B – Table S2:** Proportion of contributions of each food group to the total dietary intakes of folate, choline, betaine and methionine among 318,686 women in the European Prospective Investigation into Cancer and Nutrition (EPIC) cohort

| Food groups                | Source | Number of consumers | Betaine (%) | Choline (%) | Methionine (%) | Folate (%) |
|----------------------------|--------|---------------------|-------------|-------------|----------------|------------|
| Potatoes and other tubers  | Plant  | 314,704             | 0.1         | 13.6 (#3)   | 1.5            | 2.2        |
| Vegetables                 | Plant  | 318,629             | 4.4 (#2)    | 9.4         | 3.1            | 21.5 (#2)  |
| Legumes                    | Plant  | 239,649             | 0.0         | 1.4         | 0.9            | 5.7        |
| Fruits, nuts and seeds     | Plant  | 317,549             | 0.3         | 6.1         | 1.7            | 10.2 (#3)  |
| Dairy products             | Animal | 318,408             | 1.8         | 16.9 (#1)   | 37.7 (#1)      | 8.9        |
| Cereal and cereal products | Plant  | 318,597             | 88.9 (#1)   | 10.2        | 8.6            | 29.9 (#1)  |
| Meat and meat products     | Animal | 317,816             | 2.3 (#3)    | 12.4        | 24.1 (#2)      | 2.9        |
| Fish and shellfish         | Animal | 301,325             | 0.3         | 8.0         | 13.9 (#3)      | 1.0        |
| Egg and egg products       | Animal | 312,790             | 0.1         | 16.4 (#2)   | 4.2            | 2.1        |
| Fat                        | Mixed  | 318,658             | 0.0         | 0.8         | 0.1            | 0.1        |
| Sugar and confectionery    | Mixed  | 309,980             | 0.1         | 1.7         | 0.3            | 0.8        |
| Cake and biscuits          | Mixed  | 304,723             | 0.6         | 3.5         | 2.4            | 3.1        |
| Non-alcoholic beverages    | Mixed  | 317,395             | 0.0         | 4.7         | 0.2            | 8.2        |
| Alcoholic beverages        | Plant  | 273,719             | 0.1         | 2.3         | 0.0            | 0.8        |
| Condiments and sauces      | Mixed  | 307,555             | 0.1         | 0.6         | 0.4            | 0.5        |
| Soups, bouillons           | Mixed  | 261,306             | 0.8         | 1.1         | 0.5            | 1.0        |
| Miscellaneous              | Mixed  | 133,528             | 0.1         | 0.6         | 0.4            | 0.5        |

#1: Most important food group that contributes to the total dietary intake of betaine, choline, methionine or folate, respectively, according to the columns

#2: Second most important food group that contributes to the total dietary intake of betaine, choline, methionine or folate, respectively, according to the columns

#3: Third most important food group that contributes to the total dietary intake of betaine, choline, methionine or folate, respectively, according to the columns

## APPENDIX C - Dietary methyl-group donor intake and breast cancer risk: European Prospective Investigation into Cancer and Nutrition (EPIC)

**Appendix C - Table S3:** Characteristics of women in the European Prospective Investigation into Cancer and Nutrition (EPIC) cohort ( $N = 318,686$ ) by lowest, middle and highest quintiles of the methyl-group donor score (MGD-score).

| Characteristics                                   | Methyl-group donor score |                      |                      |
|---------------------------------------------------|--------------------------|----------------------|----------------------|
|                                                   | Q1                       | Q3                   | Q5                   |
| Number of participants                            | 63,737                   | 63,737               | 63,738               |
| Number of cases                                   | 2568                     | 2700                 | 2795                 |
| Energy intake (kcal/day) <sup>a</sup>             | 1430.2 (301.9)           | 1950.7 (318.7)       | 2672.1 (457.4)       |
| Fibre intake (g/day) <sup>a</sup>                 | 16.6 (5.2)               | 22.9 (6.2)           | 30.9 (9.3)           |
| Alcohol intake (g/day) <sup>a</sup>               | 6.7 (10.6)               | 7.8 (11.1)           | 10.1 (13.6)          |
| Vegetable intake (g/day) <sup>b</sup>             | 129.4 (74.5; 165.4)      | 179.2 (122.6; 247.5) | 274.8 (191.4; 380.1) |
| Fruit intake (g/day) <sup>b</sup>                 | 170.3 (80.8; 230.3)      | 212.9 (129.1; 317.5) | 289.5 (186.8; 420.8) |
| Cereal intake (g/day) <sup>b</sup>                | 141.1 (98.5; 174.2)      | 186.5 (142.4; 236.1) | 275.7 (209.1; 356.4) |
| Dairy intake (g/day) <sup>b</sup>                 | 208.7 (99.2; 283.0)      | 304.7 (188.6; 451.7) | 381.2 (242.6; 564.3) |
| Meat intake (g/day) <sup>b</sup>                  | 62.5 (38.4; 84.5)        | 86.4 (56.7; 116.0)   | 114.9 (75.8; 155.0)  |
| Fish and Shellfish (g/day) <sup>b</sup>           | 17.2 (8.1; 31.9)         | 29.6 (14.8; 52.5)    | 40.7 (22.9; 67.8)    |
| Egg and egg products (g/day) <sup>b</sup>         | 7.6 (2.5; 14.0)          | 14.5 (7.4; 22.8)     | 22.9 (13.1; 31.2)    |
| Age at recruitment (years) <sup>a</sup>           | 50.5 (9.9)               | 50.8 (9.8)           | 50.7 (9.1)           |
| Height (cm) <sup>a</sup>                          | 162.6 (6.5)              | 162.7 (6.6)          | 162.1 (6.5)          |
| Weight (kg) <sup>a</sup>                          | 65.8 (11.6)              | 65.6 (11.6)          | 64.9 (11.6)          |
| BMI (kg/m <sup>2</sup> ) <sup>a</sup>             | 24.9 (4.3)               | 24.8 (4.3)           | 24.7 (4.4)           |
| Waist-to-hip ratio <sup>a</sup>                   | 0.8 (0.01)               | 0.8 (0.1)            | 0.8 (0.1)            |
| Age at menopause (years) <sup>a</sup>             | 48.7 (4.8)               | 48.7 (5.0)           | 48.7 (5.0)           |
| Menopausal status at recruitment <sup>c</sup>     |                          |                      |                      |
| Premenopausal (%)                                 | 34                       | 35                   | 36                   |
| Postmenopausal (%)                                | 47                       | 46                   | 43                   |
| Perimenopausal (%)                                | 19                       | 19                   | 21                   |
| Age at menarche <sup>c</sup>                      |                          |                      |                      |
| ≤ 12 years (%)                                    | 31                       | 35                   | 40                   |
| 13 years (%)                                      | 31                       | 28                   | 27                   |
| 14 years (%)                                      | 21                       | 21                   | 20                   |
| ≥ 15 years (%)                                    | 17                       | 15                   | 13                   |
| And age at first full term pregnancy <sup>c</sup> |                          |                      |                      |
| Nulliparous (%)                                   | 16                       | 15                   | 12                   |
| ≤ 21 years (%)                                    | 21                       | 17                   | 16                   |
| 22 – 29 years (%)                                 | 46                       | 53                   | 56                   |
| ≥ 30 years (%)                                    | 9                        | 11                   | 12                   |
| Unknown (%)                                       | 7                        | 3                    | 4                    |
| Ever breastfed <sup>c</sup>                       |                          |                      |                      |

**Appendix C - Table S3:** Characteristics of women in the European Prospective Investigation into Cancer and Nutrition (EPIC) cohort ( $N = 318,686$ ) by lowest, middle and highest quintiles of the methyl-group donor score (MGD-score).

| Characteristics                                                                    | Methyl-group donor score |    |    |
|------------------------------------------------------------------------------------|--------------------------|----|----|
|                                                                                    | Q1                       | Q3 | Q5 |
| No (%)                                                                             | 25                       | 25 | 26 |
| Yes (%)                                                                            | 58                       | 65 | 66 |
| Unknown (%)                                                                        | 18                       | 10 | 8  |
| First degree relative (mother or sister) diagnosed with breast cancer <sup>c</sup> |                          |    |    |
| No (%)                                                                             | 25                       | 45 | 51 |
| Yes (%)                                                                            | 3                        | 4  | 5  |
| Unknown (%)                                                                        | 72                       | 51 | 44 |
| Smoking status <sup>c</sup>                                                        |                          |    |    |
| Never (%)                                                                          | 52                       | 55 | 59 |
| Former (%)                                                                         | 23                       | 24 | 22 |
| Current (%)                                                                        | 23                       | 19 | 16 |
| Unknown (%)                                                                        | 2                        | 2  | 3  |
| Physical activity <sup>c</sup>                                                     |                          |    |    |
| Inactive (%)                                                                       | 17                       | 14 | 13 |
| Moderately inactive (%)                                                            | 29                       | 34 | 42 |
| Moderately active (%)                                                              | 34                       | 40 | 36 |
| Active (%)                                                                         | 6                        | 8  | 8  |
| Unknown (%)                                                                        | 14                       | 4  | 1  |
| Education level <sup>c</sup>                                                       |                          |    |    |
| No schooling/ primary (%)                                                          | 30                       | 26 | 25 |
| Technical/ professional/ secondary (%)                                             | 48                       | 47 | 43 |
| Higher education/ University (%)                                                   | 20                       | 23 | 27 |
| Unknown (%)                                                                        | 3                        | 4  | 5  |
| Ever use of contraceptive pill <sup>c</sup>                                        |                          |    |    |
| No (%)                                                                             | 34                       | 39 | 41 |
| Yes (%)                                                                            | 60                       | 59 | 58 |
| Unknown (%)                                                                        | 6                        | 2  | 1  |
| Ever use of hormone replacement therapy <sup>c</sup>                               |                          |    |    |
| No (%)                                                                             | 62                       | 69 | 73 |
| Yes (%)                                                                            | 26                       | 25 | 24 |
| Unknown (%)                                                                        | 13                       | 6  | 3  |
| Ever use of dietary supplements <sup>c</sup>                                       |                          |    |    |
| No (%)                                                                             | 44                       | 50 | 58 |
| Yes (%)                                                                            | 36                       | 37 | 33 |
| Unknown (%)                                                                        | 21                       | 12 | 10 |

<sup>a</sup> Mean (SD) for continuous variables

**Appendix C - Table S3:** Characteristics of women in the European Prospective Investigation into Cancer and Nutrition (EPIC) cohort ( $N = 318,686$ ) by lowest, middle and highest quintiles of the methyl-group donor score (MGD-score).

|                 | Methyl-group donor score |    |    |
|-----------------|--------------------------|----|----|
| Characteristics | Q1                       | Q3 | Q5 |

<sup>b</sup> Median (25<sup>th</sup> percentile; 75<sup>th</sup> percentile) for continuous variables

<sup>c</sup> Frequency (%) for categorical variables

Abbreviations: EPIC: European Prospective Investigation into Cancer and nutrition; Q: quintile; SD: standard deviation; N: number of participants; BMI: Body Mass Index; MGD: methyl-group donor

## APPENDIX D - Dietary methyl-group donor intake and breast cancer risk: European Prospective Investigation into Cancer and Nutrition (EPIC)

| <b>Appendix D - Table S4:</b> Hazard ratios (HRs) and 95% confidence intervals (CIs) for breast cancer (BC) by daily dietary intake of methyl-group donors for <b>oestrogen receptor (ER)</b> positive and negative tumors in women in the EPIC cohort |                                                 |              |                                                 |                         |                                                 |              |                                                 |                         |                            |
|--------------------------------------------------------------------------------------------------------------------------------------------------------------------------------------------------------------------------------------------------------|-------------------------------------------------|--------------|-------------------------------------------------|-------------------------|-------------------------------------------------|--------------|-------------------------------------------------|-------------------------|----------------------------|
|                                                                                                                                                                                                                                                        | <b>ER positive breast cancers (N = 327,931)</b> |              |                                                 |                         | <b>ER negative breast cancers (N = 322,055)</b> |              |                                                 |                         |                            |
|                                                                                                                                                                                                                                                        | N of BC cases                                   | Person years | Multivariable model <sup>a</sup><br>HR (95% CI) | P <sub>continuous</sub> | N of BC cases                                   | Person years | Multivariable model <sup>a</sup><br>HR (95% CI) | P <sub>continuous</sub> | P <sub>heterogeneity</sub> |
| MGD score                                                                                                                                                                                                                                              |                                                 |              |                                                 |                         |                                                 |              |                                                 |                         |                            |
| Continuous (1 unit)                                                                                                                                                                                                                                    | 7513                                            | 4,446,754    | 1.00 (0.98-1.01)                                | 0.594                   | 1686                                            | 4,397,387    | 0.98 (0.95-1.01)                                | 0.250                   | 0.204                      |
| Q1: ≤ -2.58                                                                                                                                                                                                                                            | 1415                                            | 875,837      | 1 (Ref.)                                        |                         | 309                                             | 866,303      | 1 (Ref.)                                        |                         |                            |
| Q2: > -2.58 – -1.00                                                                                                                                                                                                                                    | 1382                                            | 88,8456      | 0.97 (0.90-1.06)                                |                         | 307                                             | 879,446      | 0.99 (0.83-1.17)                                |                         |                            |
| Q3: > -1.00 – 0.39                                                                                                                                                                                                                                     | 1420                                            | 895,852      | 0.98 (0.89-1.07)                                |                         | 351                                             | 886,888      | 1.07 (0.89-1.29)                                |                         |                            |
| Q4: > 0.39 – 2.31                                                                                                                                                                                                                                      | 1518                                            | 900,647      | 0.98 (0.89-1.09)                                |                         | 330                                             | 890,603      | 0.91 (0.73-1.12)                                |                         |                            |
| Q5: > 2.31                                                                                                                                                                                                                                             | 1778                                            | 885,962      | 1.03 (0.91-1.17)                                |                         | 389                                             | 874,147      | 0.87 (0.66-1.14)                                |                         |                            |
| P <sub>trend</sub>                                                                                                                                                                                                                                     |                                                 |              | 0.482                                           |                         |                                                 |              | 0.185                                           |                         |                            |
| Dietary folate (µg/day)                                                                                                                                                                                                                                |                                                 |              |                                                 |                         |                                                 |              |                                                 |                         |                            |
| Continuous (per 1 SD =128 µg/day)                                                                                                                                                                                                                      | 7513                                            | 4,446,754    | 1.01 (0.97-1.06)                                | 0.556                   | 1686                                            | 4,397,387    | 0.91 (0.83-1.01)                                | 0.082                   | 0.184                      |
| Q1: ≤ 242                                                                                                                                                                                                                                              | 1312                                            | 891,414      | 1 (Ref.)                                        |                         | 284                                             | 882,647      | 1 (Ref.)                                        |                         |                            |
| Q2: > 242 - 298                                                                                                                                                                                                                                        | 1385                                            | 890,517      | 0.93 (0.86-1.01)                                |                         | 313                                             | 881,632      | 0.94 (0.79-1.12)                                |                         |                            |
| Q3: > 298 - 357                                                                                                                                                                                                                                        | 1466                                            | 890,828      | 0.92 (0.84-1.01)                                |                         | 335                                             | 881,168      | 0.90 (0.75-1.09)                                |                         |                            |
| Q4: > 357 - 440                                                                                                                                                                                                                                        | 1628                                            | 888,475      | 0.97 (0.88-1.08)                                |                         | 363                                             | 877,858      | 0.87 (0.70-1.07)                                |                         |                            |
| Q5: > 440                                                                                                                                                                                                                                              | 1722                                            | 885,522      | 0.99 (0.87-1.13)                                |                         | 391                                             | 874,083      | 0.81 (0.62-1.06)                                |                         |                            |
| P <sub>trend</sub>                                                                                                                                                                                                                                     |                                                 |              | 0.567                                           |                         |                                                 |              | 0.123                                           |                         |                            |
| Dietary choline (mg/day)                                                                                                                                                                                                                               |                                                 |              |                                                 |                         |                                                 |              |                                                 |                         |                            |
| Continuous (per 1 SD = 90 mg/day)                                                                                                                                                                                                                      | 7513                                            | 4,446,754    | 1.00 (0.97-1.03)                                | 0.861                   | 1686                                            | 4,397,387    | 1.01 (0.95-1.08)                                | 0.760                   | 0.725                      |
| Q1: ≤ 202                                                                                                                                                                                                                                              | 1399                                            | 872,991      | 1 (Ref.)                                        |                         | 318                                             | 863,802      | 1 (Ref.)                                        |                         |                            |
| Q2: > 202 - 244                                                                                                                                                                                                                                        | 1452                                            | 884,695      | 1.01 (0.93-1.09)                                |                         | 342                                             | 875,234      | 1.07 (0.91-1.26)                                |                         |                            |
| Q3: > 244 - 285                                                                                                                                                                                                                                        | 1431                                            | 895,804      | 0.97 (0.89-1.05)                                |                         | 294                                             | 886,100      | 0.89 (0.75-1.06)                                |                         |                            |
| Q4: > 285 - 339                                                                                                                                                                                                                                        | 1497                                            | 900,079      | 0.97 (0.89-1.06)                                |                         | 329                                             | 890,092      | 0.94 (0.78-1.13)                                |                         |                            |
| Q5: > 339                                                                                                                                                                                                                                              | 1734                                            | 893,184      | 1.01 (0.91-1.12)                                |                         | 403                                             | 882,158      | 0.98 (0.79-1.21)                                |                         |                            |
| P <sub>trend</sub>                                                                                                                                                                                                                                     |                                                 |              | 0.938                                           |                         |                                                 |              | 0.632                                           |                         |                            |

|                                                                                                                                                                                                                                                                                                                                                                                                                                                                                                                                                                                                                                                                                                                                                                                                                                                                                                                                                                                                                                                                                                                                                   |      |           |                  |       |      |           |                  |       |       |
|---------------------------------------------------------------------------------------------------------------------------------------------------------------------------------------------------------------------------------------------------------------------------------------------------------------------------------------------------------------------------------------------------------------------------------------------------------------------------------------------------------------------------------------------------------------------------------------------------------------------------------------------------------------------------------------------------------------------------------------------------------------------------------------------------------------------------------------------------------------------------------------------------------------------------------------------------------------------------------------------------------------------------------------------------------------------------------------------------------------------------------------------------|------|-----------|------------------|-------|------|-----------|------------------|-------|-------|
| Dietary betaine (mg/day)                                                                                                                                                                                                                                                                                                                                                                                                                                                                                                                                                                                                                                                                                                                                                                                                                                                                                                                                                                                                                                                                                                                          |      |           |                  |       |      |           |                  |       |       |
| Continuous (per 1 SD = 88 mg/day)                                                                                                                                                                                                                                                                                                                                                                                                                                                                                                                                                                                                                                                                                                                                                                                                                                                                                                                                                                                                                                                                                                                 | 7513 | 4,446,754 | 0.99 (0.95-1.02) | 0.411 | 1686 | 4,397,387 | 0.98 (0.92-1.05) | 0.638 | 0.945 |
| Q1: ≤ 39                                                                                                                                                                                                                                                                                                                                                                                                                                                                                                                                                                                                                                                                                                                                                                                                                                                                                                                                                                                                                                                                                                                                          | 1628 | 830,958   | 1 (Ref.)         |       | 381  | 820,871   | 1 (Ref.)         |       |       |
| Q2: > 39 - 88                                                                                                                                                                                                                                                                                                                                                                                                                                                                                                                                                                                                                                                                                                                                                                                                                                                                                                                                                                                                                                                                                                                                     | 1497 | 924,908   | 0.96 (0.88-1.04) |       | 339  | 915,138   | 0.95 (0.80-1.13) |       |       |
| Q3: > 88 - 132                                                                                                                                                                                                                                                                                                                                                                                                                                                                                                                                                                                                                                                                                                                                                                                                                                                                                                                                                                                                                                                                                                                                    | 1449 | 897,150   | 1.00 (0.90-1.10) |       | 301  | 887,260   | 0.95 (0.78-1.17) |       |       |
| Q4: > 132 - 193                                                                                                                                                                                                                                                                                                                                                                                                                                                                                                                                                                                                                                                                                                                                                                                                                                                                                                                                                                                                                                                                                                                                   | 1528 | 901,167   | 0.99 (0.89-1.10) |       | 347  | 890,824   | 1.03 (0.83-1.27) |       |       |
| Q5: > 193                                                                                                                                                                                                                                                                                                                                                                                                                                                                                                                                                                                                                                                                                                                                                                                                                                                                                                                                                                                                                                                                                                                                         | 1411 | 892,572   | 0.95 (0.85-1.06) |       | 318  | 883,294   | 0.97 (0.77-1.22) |       |       |
| P <sub>trend</sub>                                                                                                                                                                                                                                                                                                                                                                                                                                                                                                                                                                                                                                                                                                                                                                                                                                                                                                                                                                                                                                                                                                                                |      |           | 0.581            |       |      |           | 0.912            |       |       |
| Dietary methionine (g/day)                                                                                                                                                                                                                                                                                                                                                                                                                                                                                                                                                                                                                                                                                                                                                                                                                                                                                                                                                                                                                                                                                                                        |      |           |                  |       |      |           |                  |       |       |
| Continuous (per 1 g/day)                                                                                                                                                                                                                                                                                                                                                                                                                                                                                                                                                                                                                                                                                                                                                                                                                                                                                                                                                                                                                                                                                                                          | 7513 | 4,446,754 | 0.98 (0.92-1.05) | 0.582 | 1686 | 4,397,387 | 0.92 (0.80-1.07) | 0.278 | 0.455 |
| Q1: ≤ 1.06                                                                                                                                                                                                                                                                                                                                                                                                                                                                                                                                                                                                                                                                                                                                                                                                                                                                                                                                                                                                                                                                                                                                        | 1242 | 903,007   | 1 (Ref.)         |       | 261  | 894,555   | 1 (Ref.)         |       |       |
| Q2: > 1.06 – 1.30                                                                                                                                                                                                                                                                                                                                                                                                                                                                                                                                                                                                                                                                                                                                                                                                                                                                                                                                                                                                                                                                                                                                 | 1458 | 887,242   | 1.05 (0.97-1.14) |       | 317  | 877,117   | 1.10 (0.93-1.30) |       |       |
| Q3: > 1.30 – 1.54                                                                                                                                                                                                                                                                                                                                                                                                                                                                                                                                                                                                                                                                                                                                                                                                                                                                                                                                                                                                                                                                                                                                 | 1494 | 889,372   | 1.02 (0.94-1.11) |       | 366  | 879,904   | 1.20 (1.01-1.42) |       |       |
| Q4: > 1.54 – 1.85                                                                                                                                                                                                                                                                                                                                                                                                                                                                                                                                                                                                                                                                                                                                                                                                                                                                                                                                                                                                                                                                                                                                 | 1551 | 888,050   | 1.00 (0.92-1.09) |       | 357  | 878,057   | 1.08 (0.90-1.31) |       |       |
| Q5: > 1.85                                                                                                                                                                                                                                                                                                                                                                                                                                                                                                                                                                                                                                                                                                                                                                                                                                                                                                                                                                                                                                                                                                                                        | 1768 | 879,083   | 1.02 (0.92-1.13) |       | 385  | 867,754   | 1.00 (0.80-1.25) |       |       |
| P <sub>trend</sub>                                                                                                                                                                                                                                                                                                                                                                                                                                                                                                                                                                                                                                                                                                                                                                                                                                                                                                                                                                                                                                                                                                                                |      |           | 0.939            |       |      |           | 0.662            |       |       |
| <sup>a</sup> Multivariable model: Cox regression model stratified by study center and one year categories of age at recruitment and adjusted for total energy intake (kcal/day), alcohol intake (g/day), dietary fibre intake (g/day), height (cm), BMI (kg/m <sup>2</sup> ), highest level of education (primary/no schooling, technical/professional/secondary, longer education, unknown), physical activity (inactive, moderately inactive, moderately active, active, unknown), smoking status (never, former, current smoker, unknown), ever use of vitamin/mineral supplements (yes, no, unknown), menopausal status at recruitment (premenopausal, postmenopausal (including surgical postmenopausal), perimenopausal), age at menarche (≤ 12, 13, 14, ≥ 15), ever use of hormones for menopause (no, yes, unknown), ever use of contraceptive pill (no, yes, unknown), and age at first full term pregnancy (nulliparous, ≤ 21y, 22-29y, ≥ 30y).<br>Abbreviations: HR: hazard ratio; CI: confidence interval; BC: breast cancer; Q: quintile; Ref: reference; MGD: methyl-group donor; N: number of participants; SD: standard deviation |      |           |                  |       |      |           |                  |       |       |

| <b>Appendix D - Table S5:</b> Hazard ratios (HRs) and 95% confidence intervals (CIs) for breast cancer (BC) by daily dietary intake of methyl-group donors for <b>progesterone receptor (PR) positive and negative tumors</b> in women in the EPIC cohort |                                                 |              |                                                 |                         |                                                 |              |                                                 |                         |                            |
|-----------------------------------------------------------------------------------------------------------------------------------------------------------------------------------------------------------------------------------------------------------|-------------------------------------------------|--------------|-------------------------------------------------|-------------------------|-------------------------------------------------|--------------|-------------------------------------------------|-------------------------|----------------------------|
|                                                                                                                                                                                                                                                           | <b>PR positive breast cancers (N = 325,488)</b> |              |                                                 |                         | <b>PR negative breast cancers (N = 323,001)</b> |              |                                                 |                         |                            |
|                                                                                                                                                                                                                                                           | N of BC cases                                   | Person years | Multivariable model <sup>a</sup><br>HR (95% CI) | P <sub>continuous</sub> | N of BC cases                                   | Person years | Multivariable model <sup>a</sup><br>HR (95% CI) | P <sub>continuous</sub> | P <sub>heterogeneity</sub> |
| MGD score                                                                                                                                                                                                                                                 |                                                 |              |                                                 |                         |                                                 |              |                                                 |                         |                            |
| Continuous (1 unit)                                                                                                                                                                                                                                       | 5083                                            | 4,427,537    | 1.00 (0.98-1.02)                                | 0.816                   | 2620                                            | 4,406,125    | 0.99 (0.96-1.02)                                | 0.387                   | 0.572                      |
| Q1: ≤ -2.58                                                                                                                                                                                                                                               | 982                                             | 872,424      | 1 (Ref.)                                        |                         | 461                                             | 867,749      | 1 (Ref.)                                        |                         |                            |
| Q2: > -2.58 – -1.00                                                                                                                                                                                                                                       | 901                                             | 884,826      | 0.97 (0.88-1.07)                                |                         | 452                                             | 880,757      | 0.97 (0.84-1.11)                                |                         |                            |
| Q3: > -1.00 – 0.39                                                                                                                                                                                                                                        | 938                                             | 892,105      | 0.99 (0.88-1.10)                                |                         | 539                                             | 888,717      | 1.08 (0.93-1.26)                                |                         |                            |
| Q4: > 0.39 – 2.31                                                                                                                                                                                                                                         | 999                                             | 896,380      | 0.98 (0.86-1.11)                                |                         | 521                                             | 892,441      | 0.95 (0.80-1.13)                                |                         |                            |
| Q5: > 2.31                                                                                                                                                                                                                                                | 1263                                            | 881,802      | 1.05 (0.90-1.23)                                |                         | 647                                             | 876,460      | 0.97 (0.78-1.21)                                |                         |                            |
| P <sub>trend</sub>                                                                                                                                                                                                                                        |                                                 |              | 0.405                                           |                         |                                                 |              | 0.711                                           |                         |                            |
| Dietary folate (µg/day)                                                                                                                                                                                                                                   |                                                 |              |                                                 |                         |                                                 |              |                                                 |                         |                            |
| Continuous (per 1 SD =128 µg/day)                                                                                                                                                                                                                         | 5083                                            | 4,427,537    | 1.02 (0.96-1.08)                                | 0.481                   | 2620                                            | 4,406,125    | 0.96 (0.88-1.04)                                | 0.307                   | 0.215                      |
| Q1: ≤ 242                                                                                                                                                                                                                                                 | 907                                             | 888,251      | 1 (Ref.)                                        |                         | 436                                             | 884,073      | 1 (Ref.)                                        |                         |                            |
| Q2: > 242 - 298                                                                                                                                                                                                                                           | 904                                             | 886,820      | 0.91 (0.82-1.00)                                |                         | 469                                             | 883,108      | 0.99 (0.86-1.13)                                |                         |                            |
| Q3: > 298 - 357                                                                                                                                                                                                                                           | 968                                             | 886,944      | 0.90 (0.80-1.00)                                |                         | 501                                             | 882,719      | 0.97 (0.83-1.13)                                |                         |                            |
| Q4: > 357 - 440                                                                                                                                                                                                                                           | 1095                                            | 884,325      | 0.95 (0.84-1.08)                                |                         | 578                                             | 879,892      | 1.03 (0.87-1.23)                                |                         |                            |
| Q5: > 440                                                                                                                                                                                                                                                 | 1209                                            | 881,198      | 0.96 (0.82-1.12)                                |                         | 636                                             | 876,334      | 1.02 (0.82-1.27)                                |                         |                            |
| P <sub>trend</sub>                                                                                                                                                                                                                                        |                                                 |              | 0.845                                           |                         |                                                 |              | 0.690                                           |                         |                            |
| Dietary choline (mg/day)                                                                                                                                                                                                                                  |                                                 |              |                                                 |                         |                                                 |              |                                                 |                         |                            |
| Continuous (per 1 SD = 90 mg/day)                                                                                                                                                                                                                         | 5083                                            | 4,427,537    | 0.99 (0.95-1.03)                                | 0.529                   | 2620                                            | 4,406,125    | 1.02 (0.97-1.08)                                | 0.456                   | 0.330                      |
| Q1: ≤ 202                                                                                                                                                                                                                                                 | 1044                                            | 870,139      | 1 (Ref.)                                        |                         | 502                                             | 865,353      | 1 (Ref.)                                        |                         |                            |
| Q2: > 202 - 244                                                                                                                                                                                                                                           | 1038                                            | 881,483      | 1.02 (0.93-1.12)                                |                         | 507                                             | 876,746      | 1.01 (0.89-1.15)                                |                         |                            |
| Q3: > 244 - 285                                                                                                                                                                                                                                           | 953                                             | 891,994      | 0.93 (0.84-1.03)                                |                         | 470                                             | 887,834      | 0.93 (0.81-1.07)                                |                         |                            |
| Q4: > 285 - 339                                                                                                                                                                                                                                           | 954                                             | 895,685      | 0.92 (0.83-1.03)                                |                         | 523                                             | 891,965      | 1.01 (0.87-1.17)                                |                         |                            |
| Q5: > 339                                                                                                                                                                                                                                                 | 1094                                            | 888,236      | 0.97 (0.86-1.10)                                |                         | 618                                             | 884,227      | 1.08 (0.91-1.28)                                |                         |                            |
| P <sub>trend</sub>                                                                                                                                                                                                                                        |                                                 |              | 0.459                                           |                         |                                                 |              | 0.298                                           |                         |                            |
| Dietary betaine (mg/day)                                                                                                                                                                                                                                  |                                                 |              |                                                 |                         |                                                 |              |                                                 |                         |                            |
| Continuous (per 1 SD = 88 mg/day)                                                                                                                                                                                                                         | 5083                                            | 4,427,537    | 1.00 (0.96-1.04)                                | 0.9150                  | 2620                                            | 4,406,125    | 0.98 (0.93-1.03)                                | 0.434                   | 0.486                      |
| Q1: ≤ 39                                                                                                                                                                                                                                                  | 1050                                            | 826,876      | 1 (Ref.)                                        |                         | 508                                             | 822,205      | 1 (Ref.)                                        |                         |                            |
| Q2: > 39 - 88                                                                                                                                                                                                                                             | 906                                             | 920,359      | 1.02 (0.91-1.15)                                |                         | 506                                             | 916,777      | 0.96 (0.83-1.11)                                |                         |                            |

|                                                                                                                                                                                                                                                                                                                                                                                                                                                                                                                                                                                                                                                                                                                                                                                                                                                                                                                                                                                                                                                                                               |      |           |                  |       |      |           |                  |       |       |
|-----------------------------------------------------------------------------------------------------------------------------------------------------------------------------------------------------------------------------------------------------------------------------------------------------------------------------------------------------------------------------------------------------------------------------------------------------------------------------------------------------------------------------------------------------------------------------------------------------------------------------------------------------------------------------------------------------------------------------------------------------------------------------------------------------------------------------------------------------------------------------------------------------------------------------------------------------------------------------------------------------------------------------------------------------------------------------------------------|------|-----------|------------------|-------|------|-----------|------------------|-------|-------|
| Q3: > 88 - 132                                                                                                                                                                                                                                                                                                                                                                                                                                                                                                                                                                                                                                                                                                                                                                                                                                                                                                                                                                                                                                                                                | 989  | 893,397   | 1.10 (0.97-1.25) |       | 502  | 889,089   | 0.92 (0.78-1.09) |       |       |
| Q4: > 132 - 193                                                                                                                                                                                                                                                                                                                                                                                                                                                                                                                                                                                                                                                                                                                                                                                                                                                                                                                                                                                                                                                                               | 1092 | 897,398   | 1.11 (0.97-1.26) |       | 559  | 892,777   | 0.94 (0.79-1.11) |       |       |
| Q5: > 193                                                                                                                                                                                                                                                                                                                                                                                                                                                                                                                                                                                                                                                                                                                                                                                                                                                                                                                                                                                                                                                                                     | 1046 | 889,506   | 1.07 (0.93-1.23) |       | 545  | 885,277   | 0.93 (0.77-1.12) |       |       |
| P <sub>trend</sub>                                                                                                                                                                                                                                                                                                                                                                                                                                                                                                                                                                                                                                                                                                                                                                                                                                                                                                                                                                                                                                                                            |      |           | 0.377            |       |      |           | 0.573            |       |       |
| Dietary methionine (g/day)                                                                                                                                                                                                                                                                                                                                                                                                                                                                                                                                                                                                                                                                                                                                                                                                                                                                                                                                                                                                                                                                    |      |           |                  |       |      |           |                  |       |       |
| Continuous (per 1g/day)                                                                                                                                                                                                                                                                                                                                                                                                                                                                                                                                                                                                                                                                                                                                                                                                                                                                                                                                                                                                                                                                       | 5083 | 4,427,537 | 0.98 (0.90-1.06) | 0.456 | 2620 | 4,406,125 | 0.94 (0.84-1.05) | 0.275 | 0.359 |
| Q1: ≤ 1.06                                                                                                                                                                                                                                                                                                                                                                                                                                                                                                                                                                                                                                                                                                                                                                                                                                                                                                                                                                                                                                                                                    | 818  | 899,537   | 1 (Ref.)         |       | 410  | 895,969   | 1 (Ref.)         |       |       |
| Q2: > 1.06 – 1.30                                                                                                                                                                                                                                                                                                                                                                                                                                                                                                                                                                                                                                                                                                                                                                                                                                                                                                                                                                                                                                                                             | 984  | 883,344   | 1.07 (0.97-1.18) |       | 473  | 878,645   | 1.01 (0.88-1.15) |       |       |
| Q3: > 1.30 – 1.54                                                                                                                                                                                                                                                                                                                                                                                                                                                                                                                                                                                                                                                                                                                                                                                                                                                                                                                                                                                                                                                                             | 976  | 885,465   | 1.00 (0.90-1.10) |       | 544  | 881,490   | 1.08 (0.94-1.24) |       |       |
| Q4: > 1.54 – 1.85                                                                                                                                                                                                                                                                                                                                                                                                                                                                                                                                                                                                                                                                                                                                                                                                                                                                                                                                                                                                                                                                             | 1049 | 884,050   | 1.00 (0.90-1.11) |       | 561  | 880,048   | 1.01 (0.87-1.17) |       |       |
| Q5: > 1.85                                                                                                                                                                                                                                                                                                                                                                                                                                                                                                                                                                                                                                                                                                                                                                                                                                                                                                                                                                                                                                                                                    | 1256 | 875,142   | 1.02 (0.90-1.15) |       | 632  | 869,974   | 0.95 (0.80-1.14) |       |       |
| P <sub>trend</sub>                                                                                                                                                                                                                                                                                                                                                                                                                                                                                                                                                                                                                                                                                                                                                                                                                                                                                                                                                                                                                                                                            |      |           | 0.851            |       |      |           | 0.490            |       |       |
| <sup>a</sup> Multivariable model: Cox regression model stratified by study center and one year categories of age at recruitment and adjusted for total energy intake (kcal/day), alcohol intake (g/day), dietary fibre intake (g/day), height (cm), BMI (kg/m <sup>2</sup> ), highest level of education (primary/no schooling, technical/professional/secondary, longer education, unknown), physical activity (inactive, moderately inactive, moderately active, active, unknown), smoking status (never, former, current smoker, unknown), ever use of vitamin/mineral supplements (yes, no, unknown), menopausal status at recruitment (premenopausal, postmenopausal (including surgical postmenopausal), perimenopausal), age at menarche (≤ 12, 13, 14, ≥ 15), ever use of hormone for menopause (no, yes, unknown), ever use of contraceptive pill (no, yes, unknown), and age at first full term pregnancy (nulliparous, ≤ 21y, 22-29y, ≥ 30y).<br>Abbreviations: HR: hazard ratio; CI: confidence interval; BC: breast cancer; Q: quintile; Ref: reference; MGD: methyl-group donor |      |           |                  |       |      |           |                  |       |       |

| <b>Appendix D - Table S6:</b> Hazard ratios (HRs) and 95% confidence intervals (CIs) for breast cancer (BC) by daily dietary intake of methyl-group donors for <b>human epidermal growth factor receptor (HER2) positive and negative tumors</b> in women in the EPIC cohort |                                                   |              |                                                 |                                         |                                                   |              |                                                 |                   |                            |
|------------------------------------------------------------------------------------------------------------------------------------------------------------------------------------------------------------------------------------------------------------------------------|---------------------------------------------------|--------------|-------------------------------------------------|-----------------------------------------|---------------------------------------------------|--------------|-------------------------------------------------|-------------------|----------------------------|
|                                                                                                                                                                                                                                                                              | <b>HER2 positive breast cancers (N = 321,238)</b> |              |                                                 |                                         | <b>HER2 negative breast cancers (N = 323,996)</b> |              |                                                 |                   |                            |
|                                                                                                                                                                                                                                                                              | N of BC cases                                     | Person years | Multivariable model <sup>a</sup><br>HR (95% CI) | P <sub>cont</sub><br>P <sub>trend</sub> | N of BC cases                                     | Person years | Multivariable model <sup>a</sup><br>HR (95% CI) | P <sub>cont</sub> | P <sub>heterogeneity</sub> |
| MGD score                                                                                                                                                                                                                                                                    |                                                   |              |                                                 |                                         |                                                   |              |                                                 |                   |                            |
| Continuous (1 unit)                                                                                                                                                                                                                                                          | 859                                               | 4,393,558    | 0.99 (0.95-1.04)                                | 0.768                                   | 3600                                              | 4,423,226    | 0.99 (0.97-1.01)                                | 0.400             | 0.803                      |
| Q1: ≤ -2.58                                                                                                                                                                                                                                                                  | 161                                               | 865,581      | 1 (Ref.)                                        |                                         | 833                                               | 872,490      | 1 (Ref.)                                        |                   |                            |
| Q2: > -2.58 – -1.00                                                                                                                                                                                                                                                          | 170                                               | 878,815      | 1.15 (0.91-1.46)                                |                                         | 696                                               | 884,452      | 0.95 (0.85-1.06)                                |                   |                            |
| Q3: > -1.00 – 0.39                                                                                                                                                                                                                                                           | 167                                               | 886,001      | 1.15 (0.88-1.50)                                |                                         | 666                                               | 891,456      | 0.93 (0.82-1.05)                                |                   |                            |
| Q4: > 0.39 – 2.31                                                                                                                                                                                                                                                            | 157                                               | 889,689      | 1.03 (0.76-1.39)                                |                                         | 676                                               | 895,572      | 0.91 (0.79-1.05)                                |                   |                            |
| Q5: > 2.31                                                                                                                                                                                                                                                                   | 204                                               | 873,472      | 1.18 (0.81-1.73)                                |                                         | 729                                               | 879,257      | 0.91 (0.75-1.10)                                |                   |                            |
| P <sub>trend</sub>                                                                                                                                                                                                                                                           |                                                   |              | 0.635                                           |                                         |                                                   |              | 0.344                                           |                   |                            |
| Dietary folate (µg/day)                                                                                                                                                                                                                                                      |                                                   |              |                                                 |                                         |                                                   |              |                                                 |                   |                            |
| Continuous (per 1 SD =128 µg/day)                                                                                                                                                                                                                                            | 859                                               | 4,393,558    | 0.97 (0.84-1.11)                                | 0.640                                   | 3600                                              | 4,423,226    | 1.04 (0.97-1.11)                                | 0.232             | 0.348                      |
| Q1: ≤ 242                                                                                                                                                                                                                                                                    | 117                                               | 881,718      | 1 (Ref.)                                        |                                         | 633                                               | 887,167      | 1 (Ref.)                                        |                   |                            |
| Q2: > 242 - 298                                                                                                                                                                                                                                                              | 174                                               | 880,968      | 1.22 (0.95-1.56)                                |                                         | 717                                               | 886,806      | 0.96 (0.85-1.07)                                |                   |                            |
| Q3: > 298 - 357                                                                                                                                                                                                                                                              | 189                                               | 880,492      | 1.22 (0.93-1.59)                                |                                         | 786                                               | 886,978      | 1.00 (0.88-1.14)                                |                   |                            |
| Q4: > 357 - 440                                                                                                                                                                                                                                                              | 183                                               | 877,100      | 1.15 (0.85-1.57)                                |                                         | 744                                               | 883,175      | 0.98 (0.85-1.13)                                |                   |                            |
| Q5: > 440                                                                                                                                                                                                                                                                    | 196                                               | 873,280      | 1.28 (0.87-1.88)                                |                                         | 720                                               | 879,100      | 1.05 (0.87-1.26)                                |                   |                            |
| P <sub>trend</sub>                                                                                                                                                                                                                                                           |                                                   |              | 0.407                                           |                                         |                                                   |              | 0.519                                           |                   |                            |
| Dietary choline (mg/day)                                                                                                                                                                                                                                                     |                                                   |              |                                                 |                                         |                                                   |              |                                                 |                   |                            |
| Continuous (per 1 SD = 90 mg/day)                                                                                                                                                                                                                                            | 859                                               | 4,393,558    | 1.03 (0.93-1.13)                                | 0.607                                   | 3600                                              | 4,423,226    | 0.97 (0.92-1.02)                                | 0.242             | 0.320                      |
| Q1: ≤ 202                                                                                                                                                                                                                                                                    | 173                                               | 863,016      | 1 (Ref.)                                        |                                         | 825                                               | 869,551      | 1 (Ref.)                                        |                   |                            |
| Q2: > 202 - 244                                                                                                                                                                                                                                                              | 179                                               | 874,435      | 1.10 (0.88-1.37)                                |                                         | 752                                               | 880,598      | 1.02 (0.91-1.13)                                |                   |                            |
| Q3: > 244 - 285                                                                                                                                                                                                                                                              | 159                                               | 885,674      | 0.99 (0.78-1.27)                                |                                         | 628                                               | 890,722      | 0.87 (0.78-0.98)                                |                   |                            |
| Q4: > 285 - 339                                                                                                                                                                                                                                                              | 155                                               | 889,251      | 0.96 (0.74-1.26)                                |                                         | 674                                               | 895,168      | 0.94 (0.83-1.07)                                |                   |                            |
| Q5: > 339                                                                                                                                                                                                                                                                    | 193                                               | 881,183      | 1.11 (0.82-1.50)                                |                                         | 721                                               | 887,188      | 0.95 (0.81-1.10)                                |                   |                            |
| P <sub>trend</sub>                                                                                                                                                                                                                                                           |                                                   |              | 0.700                                           |                                         |                                                   |              | 0.403                                           |                   |                            |
| Dietary betaine (mg/day)                                                                                                                                                                                                                                                     |                                                   |              |                                                 |                                         |                                                   |              |                                                 |                   |                            |
| Continuous (per 1 SD = 88 mg/day)                                                                                                                                                                                                                                            | 859                                               | 4,393,558    | 0.98 (0.89-1.08)                                | 0.707                                   | 3600                                              | 4,423,226    | 1.00 (0.95-1.05)                                | 0.868             | 0.795                      |
| Q1: ≤ 39                                                                                                                                                                                                                                                                     | 230                                               | 820,383      | 1 (Ref.)                                        |                                         | 989                                               | 827,989      | 1 (Ref.)                                        |                   |                            |
| Q2: > 39 - 88                                                                                                                                                                                                                                                                | 156                                               | 914,240      | 0.87 (0.68-1.12)                                |                                         | 717                                               | 920,483      | 1.03 (0.91-1.16)                                |                   |                            |

|                                                                                                                                                                                                                                                                                                                                                                                                                                                                                                                                                                                                                                                                                                                                                                                                                                                                                                                                                                                                                                                                                                                                                   |     |           |                  |       |      |           |                  |       |       |
|---------------------------------------------------------------------------------------------------------------------------------------------------------------------------------------------------------------------------------------------------------------------------------------------------------------------------------------------------------------------------------------------------------------------------------------------------------------------------------------------------------------------------------------------------------------------------------------------------------------------------------------------------------------------------------------------------------------------------------------------------------------------------------------------------------------------------------------------------------------------------------------------------------------------------------------------------------------------------------------------------------------------------------------------------------------------------------------------------------------------------------------------------|-----|-----------|------------------|-------|------|-----------|------------------|-------|-------|
| Q3: > 88 - 132                                                                                                                                                                                                                                                                                                                                                                                                                                                                                                                                                                                                                                                                                                                                                                                                                                                                                                                                                                                                                                                                                                                                    | 148 | 886,562   | 1.03 (0.77-1.37) |       | 631  | 891977    | 1.14 (0.99-1.31) |       |       |
| Q4: > 132 - 193                                                                                                                                                                                                                                                                                                                                                                                                                                                                                                                                                                                                                                                                                                                                                                                                                                                                                                                                                                                                                                                                                                                                   | 165 | 889,808   | 0.98 (0.72-1.33) |       | 688  | 895680    | 1.09 (0.94-1.27) |       |       |
| Q5: > 193                                                                                                                                                                                                                                                                                                                                                                                                                                                                                                                                                                                                                                                                                                                                                                                                                                                                                                                                                                                                                                                                                                                                         | 160 | 882,566   | 0.96 (0.69-1.33) |       | 575  | 887096    | 1.03 (0.87-1.21) |       |       |
| P <sub>trend</sub>                                                                                                                                                                                                                                                                                                                                                                                                                                                                                                                                                                                                                                                                                                                                                                                                                                                                                                                                                                                                                                                                                                                                |     |           | 0.901            |       |      |           | 0.997            |       |       |
| Dietary methionine (g/day)                                                                                                                                                                                                                                                                                                                                                                                                                                                                                                                                                                                                                                                                                                                                                                                                                                                                                                                                                                                                                                                                                                                        |     |           |                  |       |      |           |                  |       |       |
| Continuous (per 1g/day)                                                                                                                                                                                                                                                                                                                                                                                                                                                                                                                                                                                                                                                                                                                                                                                                                                                                                                                                                                                                                                                                                                                           | 859 | 4,393,558 | 0.96 (0.78-1.17) | 0.667 | 3600 | 4,423,226 | 0.93 (0.84-1.03) | 0.176 | 0.259 |
| Q1: ≤ 1.06                                                                                                                                                                                                                                                                                                                                                                                                                                                                                                                                                                                                                                                                                                                                                                                                                                                                                                                                                                                                                                                                                                                                        | 128 | 893,748   | 1 (Ref.)         |       | 654  | 899,461   | 1 (Ref.)         |       |       |
| Q2: > 1.06 – 1.30                                                                                                                                                                                                                                                                                                                                                                                                                                                                                                                                                                                                                                                                                                                                                                                                                                                                                                                                                                                                                                                                                                                                 | 178 | 876,629   | 1.27 (1.01-1.61) |       | 765  | 882,822   | 1.10 (0.99-1.23) |       |       |
| Q3: > 1.30 – 1.54                                                                                                                                                                                                                                                                                                                                                                                                                                                                                                                                                                                                                                                                                                                                                                                                                                                                                                                                                                                                                                                                                                                                 | 174 | 878,926   | 1.17 (0.91-1.51) |       | 708  | 884,839   | 0.98 (0.87-1.11) |       |       |
| Q4: > 1.54 – 1.85                                                                                                                                                                                                                                                                                                                                                                                                                                                                                                                                                                                                                                                                                                                                                                                                                                                                                                                                                                                                                                                                                                                                 | 173 | 877,111   | 1.07 (0.82-1.40) |       | 715  | 883,132   | 0.96 (0.85-1.09) |       |       |
| Q5: > 1.85                                                                                                                                                                                                                                                                                                                                                                                                                                                                                                                                                                                                                                                                                                                                                                                                                                                                                                                                                                                                                                                                                                                                        | 206 | 867,144   | 1.09 (0.80-1.49) |       | 758  | 872,973   | 0.93 (0.79-1.08) |       |       |
| P <sub>trend</sub>                                                                                                                                                                                                                                                                                                                                                                                                                                                                                                                                                                                                                                                                                                                                                                                                                                                                                                                                                                                                                                                                                                                                |     |           | 0.856            |       |      |           | 0.096            |       |       |
| <sup>a</sup> Multivariable model: Cox regression model stratified by study center and one year categories of age at recruitment and adjusted for total energy intake (kcal/day), alcohol intake (g/day), dietary fibre intake (g/day), height (cm), BMI (kg/m <sup>2</sup> ), highest level of education (primary/no schooling, technical/professional/secondary, longer education, unknown), physical activity (inactive, moderately inactive, moderately active, active, unknown), smoking status (never, former, current smoker, unknown), ever use of vitamin/mineral supplements (yes, no, unknown), menopausal status at recruitment (premenopausal, postmenopausal (including surgical postmenopausal), perimenopausal), age at menarche (≤ 12, 13, 14, ≥ 15), ever use of hormones for menopause (no, yes, unknown), ever use of contraceptive pill (no, yes, unknown), and age at first full term pregnancy (nulliparous, ≤ 21y, 22-29y, ≥ 30y).<br>Abbreviations: HR: hazard ratio; CI: confidence interval; BC: breast cancer; Q: quintile; Ref: reference; MGD: methyl-group donor; N: number of participants; SD: standard deviation |     |           |                  |       |      |           |                  |       |       |

| <b>Appendix D - Table S7: Hazard ratios (HRs) and 95% confidence intervals (CIs) for breast cancer (BC) by daily dietary intake of methyl-group donors for oestrogen receptor and progesterone receptor positive or negative tumors in women in the EPIC cohort</b> |                                                    |              |                                                 |                         |                                                    |              |                                                 |                         |                            |
|---------------------------------------------------------------------------------------------------------------------------------------------------------------------------------------------------------------------------------------------------------------------|----------------------------------------------------|--------------|-------------------------------------------------|-------------------------|----------------------------------------------------|--------------|-------------------------------------------------|-------------------------|----------------------------|
|                                                                                                                                                                                                                                                                     | <b>ER/PR positive breast cancers (N = 325,236)</b> |              |                                                 |                         | <b>ER/PR negative breast cancers (N = 321,644)</b> |              |                                                 |                         |                            |
|                                                                                                                                                                                                                                                                     | N of BC cases                                      | Person years | Multivariable model <sup>a</sup><br>HR (95% CI) | P <sub>continuous</sub> | N of BC cases                                      | Person years | Multivariable model <sup>a</sup><br>HR (95% CI) | P <sub>continuous</sub> | P <sub>heterogeneity</sub> |
| MGD score                                                                                                                                                                                                                                                           |                                                    |              |                                                 |                         |                                                    |              |                                                 |                         |                            |
| Continuous (1 unit)                                                                                                                                                                                                                                                 | 4833                                               | 4,426,138    | 1.00 (0.98-1.02)                                | 0.777                   | 1276                                               | 4,395,076    | 0.98 (0.94-1.02)                                | 0.240                   | 0.309                      |
| Q1: ≤ -2.58                                                                                                                                                                                                                                                         | 943                                                | 872,248      | 1 (Ref.)                                        |                         | 245                                                | 866,008      | 1 (Ref.)                                        |                         |                            |
| Q2: > -2.58 – -1.00                                                                                                                                                                                                                                                 | 858                                                | 884,535      | 0.96 (0.87-1.06)                                |                         | 226                                                | 878,940      | 0.94 (0.78-1.15)                                |                         |                            |
| Q3: > -1.00 – 0.39                                                                                                                                                                                                                                                  | 881                                                | 891,780      | 0.96 (0.86-1.08)                                |                         | 258                                                | 886,394      | 1.03 (0.83-1.27)                                |                         |                            |
| Q4: > 0.39 – 2.31                                                                                                                                                                                                                                                   | 950                                                | 896,144      | 0.97 (0.86-1.11)                                |                         | 251                                                | 890,147      | 0.90 (0.71-1.16)                                |                         |                            |
| Q5: > 2.31                                                                                                                                                                                                                                                          | 1201                                               | 881,430      | 1.06 (0.90-1.24)                                |                         | 296                                                | 873,587      | 0.86 (0.63-1.18)                                |                         |                            |
| P <sub>trend</sub>                                                                                                                                                                                                                                                  |                                                    |              | 0.342                                           |                         |                                                    |              | 0.313                                           |                         |                            |
| Dietary folate (µg/day)                                                                                                                                                                                                                                             |                                                    |              |                                                 |                         |                                                    |              |                                                 |                         |                            |
| Continuous (per 1 SD = 128 µg/day)                                                                                                                                                                                                                                  | 4833                                               | 4,426,138    | 1.02 (0.96-1.08)                                | 0.498                   | 1276                                               | 4,395,076    | 0.91 (0.81-1.02)                                | 0.100                   | 0.076                      |
| Q1: ≤ 242                                                                                                                                                                                                                                                           | 867                                                | 888,042      | 1 (Ref.)                                        |                         | 214                                                | 882,295      | 1 (Ref.)                                        |                         |                            |
| Q2: > 242 - 298                                                                                                                                                                                                                                                     | 861                                                | 886,563      | 0.90 (0.81-1.00)                                |                         | 240                                                | 881,225      | 0.99 (0.81-1.20)                                |                         |                            |
| Q3: > 298 - 357                                                                                                                                                                                                                                                     | 924                                                | 886,680      | 0.89 (0.80-1.00)                                |                         | 251                                                | 880,655      | 0.94 (0.75-1.16)                                |                         |                            |
| Q4: > 357 - 440                                                                                                                                                                                                                                                     | 1037                                               | 884,036      | 0.95 (0.84-1.08)                                |                         | 275                                                | 877,385      | 0.92 (0.72-1.18)                                |                         |                            |
| Q5: > 440                                                                                                                                                                                                                                                           | 1144                                               | 880,817      | 0.96 (0.82-1.13)                                |                         | 296                                                | 873,516      | 0.86 (0.63-1.17)                                |                         |                            |
| P <sub>trend</sub>                                                                                                                                                                                                                                                  |                                                    |              | 0.801                                           |                         |                                                    |              | 0.294                                           |                         |                            |
| Dietary choline (mg/day)                                                                                                                                                                                                                                            |                                                    |              |                                                 |                         |                                                    |              |                                                 |                         |                            |
| Continuous (per 1 SD = 90 mg/day)                                                                                                                                                                                                                                   | 4833                                               | 4,426,138    | 0.98 (0.94-1.03)                                | 0.459                   | 1276                                               | 4,395,076    | 1.01 (0.93-1.09)                                | 0.841                   | 0.512                      |
| Q1: ≤ 202                                                                                                                                                                                                                                                           | 995                                                | 869,860      | 1 (Ref.)                                        |                         | 256                                                | 863,442      | 1 (Ref.)                                        |                         |                            |
| Q2: > 202 - 244                                                                                                                                                                                                                                                     | 974                                                | 881,109      | 1.00 (0.91-1.10)                                |                         | 257                                                | 874,758      | 1.04 (0.87-1.25)                                |                         |                            |
| Q3: > 244 - 285                                                                                                                                                                                                                                                     | 911                                                | 891,781      | 0.93 (0.84-1.03)                                |                         | 214                                                | 885,674      | 0.85 (0.69-1.04)                                |                         |                            |
| Q4: > 285 - 339                                                                                                                                                                                                                                                     | 915                                                | 895,488      | 0.93 (0.83-1.04)                                |                         | 252                                                | 889,677      | 0.96 (0.77-1.19)                                |                         |                            |
| Q5: > 339                                                                                                                                                                                                                                                           | 1038                                               | 887,900      | 0.97 (0.85-1.10)                                |                         | 297                                                | 881,526      | 0.98 (0.77-1.26)                                |                         |                            |
| P <sub>trend</sub>                                                                                                                                                                                                                                                  |                                                    |              | 0.515                                           |                         |                                                    |              | 0.868                                           |                         |                            |
| Dietary betaine (mg/day)                                                                                                                                                                                                                                            |                                                    |              |                                                 |                         |                                                    |              |                                                 |                         |                            |
| Continuous (per 1 SD = 88 mg/day)                                                                                                                                                                                                                                   | 4833                                               | 4,426,138    | 1.00 (0.96-1.04)                                | 0.878                   | 1276                                               | 4,395,076    | 0.99 (0.91-1.07)                                | 0.711                   | 0.672                      |
| Q1: ≤ 39                                                                                                                                                                                                                                                            | 1011                                               | 826,709      | 1 (Ref.)                                        |                         | 287                                                | 820,470      | 1 (Ref.)                                        |                         |                            |
| Q2: > 39 - 88                                                                                                                                                                                                                                                       | 857                                                | 920,083      | 1.01 (0.90-1.14)                                |                         | 251                                                | 914,607      | 0.99 (0.80-1.21)                                |                         |                            |

|                                                                                                                                                                                                                                                                                                                                                                                                                                                                                                                                                                                                                                                                                                                                                                                                                                                                                                                                                                                                                                                                                                                                                   |      |           |                  |       |      |           |                  |       |       |
|---------------------------------------------------------------------------------------------------------------------------------------------------------------------------------------------------------------------------------------------------------------------------------------------------------------------------------------------------------------------------------------------------------------------------------------------------------------------------------------------------------------------------------------------------------------------------------------------------------------------------------------------------------------------------------------------------------------------------------------------------------------------------------------------------------------------------------------------------------------------------------------------------------------------------------------------------------------------------------------------------------------------------------------------------------------------------------------------------------------------------------------------------|------|-----------|------------------|-------|------|-----------|------------------|-------|-------|
| Q3: > 88 - 132                                                                                                                                                                                                                                                                                                                                                                                                                                                                                                                                                                                                                                                                                                                                                                                                                                                                                                                                                                                                                                                                                                                                    | 938  | 893,133   | 1.08 (0.95-1.23) |       | 229  | 886,886   | 0.96 (0.75-1.22) |       |       |
| Q4: > 132 - 193                                                                                                                                                                                                                                                                                                                                                                                                                                                                                                                                                                                                                                                                                                                                                                                                                                                                                                                                                                                                                                                                                                                                   | 1039 | 897,075   | 1.09 (0.96-1.25) |       | 263  | 890,289   | 1.01 (0.79-1.30) |       |       |
| Q5: > 193                                                                                                                                                                                                                                                                                                                                                                                                                                                                                                                                                                                                                                                                                                                                                                                                                                                                                                                                                                                                                                                                                                                                         | 988  | 889,137   | 1.05 (0.91-1.22) |       | 246  | 882,824   | 0.97 (0.74-1.27) |       |       |
| P <sub>trend</sub>                                                                                                                                                                                                                                                                                                                                                                                                                                                                                                                                                                                                                                                                                                                                                                                                                                                                                                                                                                                                                                                                                                                                |      |           | 0.472            |       |      |           | 0.919            |       |       |
| Dietary methionine (g/day)                                                                                                                                                                                                                                                                                                                                                                                                                                                                                                                                                                                                                                                                                                                                                                                                                                                                                                                                                                                                                                                                                                                        |      |           |                  |       |      |           |                  |       |       |
| Continuous (per 1g/day)                                                                                                                                                                                                                                                                                                                                                                                                                                                                                                                                                                                                                                                                                                                                                                                                                                                                                                                                                                                                                                                                                                                           | 4833 | 4,426,138 | 0.98 (0.90-1.07) | 0.615 | 1276 | 4,395,076 | 0.90 (0.77-1.07) | 0.239 | 0.244 |
| Q1: ≤ 1.06                                                                                                                                                                                                                                                                                                                                                                                                                                                                                                                                                                                                                                                                                                                                                                                                                                                                                                                                                                                                                                                                                                                                        | 788  | 899,375   | 1 (Ref.)         |       | 208  | 894,264   | 1 (Ref.)         |       |       |
| Q2: > 1.06 – 1.30                                                                                                                                                                                                                                                                                                                                                                                                                                                                                                                                                                                                                                                                                                                                                                                                                                                                                                                                                                                                                                                                                                                                 | 933  | 883,048   | 1.05 (0.95-1.16) |       | 233  | 876,622   | 1.01 (0.83-1.23) |       |       |
| Q3: > 1.30 – 1.54                                                                                                                                                                                                                                                                                                                                                                                                                                                                                                                                                                                                                                                                                                                                                                                                                                                                                                                                                                                                                                                                                                                                 | 923  | 885,187   | 0.98 (0.88-1.09) |       | 275  | 879,396   | 1.13 (0.93-1.38) |       |       |
| Q4: > 1.54 – 1.85                                                                                                                                                                                                                                                                                                                                                                                                                                                                                                                                                                                                                                                                                                                                                                                                                                                                                                                                                                                                                                                                                                                                 | 992  | 883,697   | 0.98 (0.88-1.10) |       | 267  | 877,558   | 1.02 (0.82-1.26) |       |       |
| Q5: > 1.85                                                                                                                                                                                                                                                                                                                                                                                                                                                                                                                                                                                                                                                                                                                                                                                                                                                                                                                                                                                                                                                                                                                                        | 1197 | 874,831   | 1.02 (0.89-1.16) |       | 293  | 867,237   | 0.96 (0.75-1.24) |       |       |
| P <sub>trend</sub>                                                                                                                                                                                                                                                                                                                                                                                                                                                                                                                                                                                                                                                                                                                                                                                                                                                                                                                                                                                                                                                                                                                                |      |           | 0.929            |       |      |           | 0.635            |       |       |
| <sup>a</sup> Multivariable model: Cox regression model stratified by study center and one year categories of age at recruitment and adjusted for total energy intake (kcal/day), alcohol intake (g/day), dietary fibre intake (g/day), height (cm), BMI (kg/m <sup>2</sup> ), highest level of education (primary/no schooling, technical/professional/secondary, longer education, unknown), physical activity (inactive, moderately inactive, moderately active, active, unknown), smoking status (never, former, current smoker, unknown), ever use of vitamin/mineral supplements (yes, no, unknown), menopausal status at recruitment (premenopausal, postmenopausal (including surgical postmenopausal), perimenopausal), age at menarche (≤ 12, 13, 14, ≥ 15), ever use of hormones for menopause (no, yes, unknown), ever use of contraceptive pill (no, yes, unknown), and age at first full term pregnancy (nulliparous, ≤ 21y, 22-29y, ≥ 30y).<br>Abbreviations: HR: hazard ratio; CI: confidence interval; BC: breast cancer; Q: quintile; Ref: reference; MGD: methyl-group donor; N: number of participants; SD: standard deviation |      |           |                  |       |      |           |                  |       |       |
